# Supplementary material for: Compliance Risk Assessment in the Banking Sector: Application of a Novel Pairwise Comparison-Based PRISM Method
Source: Hindawi journal article supplement (doi:10.1155/2023/9165815), 2023-05-15
Supplement: f1 [file 9165815.f1.doc]

## Appendix A

The individual results of the pairwise comparisons.

Table a1 The results of Expert 1’s pairwise comparison (occurrence)

|  | C1 | C2 | C3 | C4 | C5 | C6 | ai | rank | scale (1-4) |
| --- | --- | --- | --- | --- | --- | --- | --- | --- | --- |
| C1 |  |  |  | 1 | 1 |  | 2 | 4 | 2,3 |
| C2 | 1 |  | 1 | 1 | 1 |  | 4 | 2 | 3,2 |
| C3 | 1 |  |  | 1 | 1 |  | 3 | 3 | 2,7 |
| C4 |  |  |  |  |  |  | 0 | 6 | 1 |
| C5 |  |  |  | 1 |  |  | 1 | 5 | 1,8 |
| C6 | 1 | 1 | 1 | 1 | 1 |  | 5 | 1 | 4 |

Table a2 The results of Expert 1’s pairwise comparison (severity)

|  | C1 | C2 | C3 | C4 | C5 | C6 | ai | rank | scale (1-4) |
| --- | --- | --- | --- | --- | --- | --- | --- | --- | --- |
| C1 |  | 1 |  | 1 | 1 | 1 | 4 | 2 | 3,2 |
| C2 |  |  |  |  |  |  | 0 | 6 | 1 |
| C3 | 1 | 1 |  | 1 | 1 | 1 | 5 | 1 | 4 |
| C4 |  | 1 |  |  | 1 | 1 | 3 | 3 | 2,7 |
| C5 |  | 1 |  |  |  |  | 1 | 5 | 1,8 |
| C6 |  | 1 |  |  | 1 |  | 2 | 4 | 2,3 |

Table a3 The results of Expert 1’s pairwise comparison (detection)

|  | C1 | C2 | C3 | C4 | C5 | C6 | ai | rank | scale (1-4) |
| --- | --- | --- | --- | --- | --- | --- | --- | --- | --- |
| C1 |  |  | 1 |  | 1 |  | 2 | 4 | 2,3 |
| C2 | 1 |  | 1 | 1 | 1 |  | 4 | 2 | 3,2 |
| C3 |  |  |  |  |  |  | 0 | 6 | 1 |
| C4 | 1 |  | 1 |  | 1 |  | 3 | 3 | 2,7 |
| C5 |  |  | 1 |  |  |  | 1 | 5 | 1,8 |
| C6 | 1 | 1 | 1 | 1 | 1 |  | 5 | 1 | 4 |

Table a4 The results of Expert 2’s pairwise comparison (occurrence)

|  | C1 | C2 | C3 | C4 | C5 | C6 | ai | rank | scale (1-4) |
| --- | --- | --- | --- | --- | --- | --- | --- | --- | --- |
| C1 |  |  | 1 | 1 | 1 |  | 3 | 3 | 2,7 |
| C2 | 1 |  | 1 | 1 | 1 | 1 | 5 | 1 | 4 |
| C3 |  |  |  | 1 | 1 |  | 2 | 4 | 2,3 |
| C4 |  |  |  |  | 1 |  | 1 | 5 | 1,8 |
| C5 |  |  |  |  |  |  | 0 | 6 | 1 |
| C6 | 1 |  | 1 | 1 | 1 |  | 4 | 2 | 3,2 |

Table a5 The results of Expert 2’s pairwise comparison (severity)

|  | C1 | C2 | C3 | C4 | C5 | C6 | ai | rank | scale (1-4) |
| --- | --- | --- | --- | --- | --- | --- | --- | --- | --- |
| C1 |  | 1 |  | 1 | 1 | 1 | 4 | 2 | 3,2 |
| C2 |  |  |  |  |  |  | 0 | 6 | 1 |
| C3 | 1 | 1 |  | 1 | 1 | 1 | 5 | 1 | 4 |
| C4 |  | 1 |  |  | 1 | 1 | 3 | 3 | 2,7 |
| C5 |  | 1 |  |  |  |  | 1 | 5 | 1,8 |
| C6 |  | 1 |  |  | 1 |  | 2 | 4 | 2,3 |

Table a6 The results of Expert 2’s pairwise comparison (detection)

|  | C1 | C2 | C3 | C4 | C5 | C6 | ai | rank | scale (1-4) |
| --- | --- | --- | --- | --- | --- | --- | --- | --- | --- |
| C1 |  |  | 1 |  | 1 |  | 2 | 3 | 2,3 |
| C2 | 1 |  |  | 1 | 1 |  | 3 | 2 | 2,7 |
| C3 |  | 1 |  |  | 1 |  | 2 | 3 | 2,3 |
| C4 | 1 |  | 1 |  | 1 |  | 3 | 2 | 2,7 |
| C5 |  |  |  |  |  |  | 0 | 4 | 1 |
| C6 | 1 | 1 | 1 | 1 | 1 |  | 5 | 1 | 4 |

Table a7 The results of Expert 3’s pairwise comparison (occurrence) - inconsistent

|  | C1 | C2 | C3 | C4 | C5 | C6 | ai | rank | scale (1-4) |
| --- | --- | --- | --- | --- | --- | --- | --- | --- | --- |
| C1 |  |  | 1 | 1 | 1 | 1 | 4 | 1 | 3,2 |
| C2 | 1 |  | 1 |  | 1 | 1 | 4 | 1 | 3,2 |
| C3 |  |  |  | 1 |  |  | 1 | 4 | 1,8 |
| C4 |  | 1 |  |  |  |  | 1 | 4 | 1,8 |
| C5 |  |  | 1 | 1 |  |  | 2 | 3 | 2,3 |
| C6 |  |  | 1 | 1 | 1 |  | 3 | 2 | 2,7 |

Table a8 The results of Expert 3’s pairwise comparison (severity)

|  | C1 | C2 | C3 | C4 | C5 | C6 | ai | rank | scale (1-4) |
| --- | --- | --- | --- | --- | --- | --- | --- | --- | --- |
| C1 |  | 1 | 1 |  | 1 | 1 | 4 | 1 | 3,2 |
| C2 |  |  |  |  |  |  | 0 | 4 | 1 |
| C3 |  | 1 |  | 1 | 1 | 1 | 4 | 1 | 3,2 |
| C4 | 1 | 1 |  |  | 1 | 1 | 4 | 1 | 3,2 |
| C5 |  | 1 |  |  |  | 1 | 2 | 2 | 2,3 |
| C6 |  | 1 |  |  |  |  | 1 | 3 | 1,8 |

Table a9 The results of Expert 3’s pairwise comparison (detection) - inconsistent

|  | C1 | C2 | C3 | C4 | C5 | C6 | ai | rank | scale (1-4) |
| --- | --- | --- | --- | --- | --- | --- | --- | --- | --- |
| C1 |  | 1 |  | 1 | 1 |  | 3 | 2 | 2,7 |
| C2 |  |  |  | 1 | 1 |  | 2 | 3 | 2,3 |
| C3 | 1 | 1 |  |  | 1 | 1 | 4 | 1 | 3,2 |
| C4 |  |  | 1 |  | 1 |  | 2 | 3 | 2,3 |
| C5 |  |  |  |  |  |  | 0 | 4 | 1 |
| C6 | 1 | 1 |  | 1 | 1 |  | 4 | 1 | 3,2 |

## Appendix B

The aggregated results including the sufficiently consistent individual results.

Table b1 The results of aggregation (occurrence)

|  | C1 | C2 | C3 | C4 | C5 | C6 | ai | rank | scale (1-4) |
| --- | --- | --- | --- | --- | --- | --- | --- | --- | --- |
| C1 |  | 0 | 1 | 2 | 2 | 0 | 5 | 2 | 2,5 |
| C2 | 2 |  | 2 | 2 | 2 | 1 | 9 | 1 | 3,6 |
| C3 | 1 | 0 |  | 2 | 2 | 0 | 5 | 2 | 2,5 |
| C4 | 0 | 0 | 0 |  | 1 | 0 | 1 | 3 | 1,4 |
| C5 | 0 | 0 | 0 | 1 |  | 0 | 1 | 3 | 1,4 |
| C6 | 2 | 1 | 2 | 2 | 2 |  | 9 | 1 | 3,6 |

Table b2 The results of aggregation (severity)

|  | C1 | C2 | C3 | C4 | C5 | C6 | ai | rank | scale (1-4) |
| --- | --- | --- | --- | --- | --- | --- | --- | --- | --- |
| C1 |  | 3 | 1 | 2 | 3 | 3 | 12 | 2 | 3,2 |
| C2 | 0 |  | 0 | 0 | 0 | 0 | 0 | 6 | 1 |
| C3 | 2 | 3 |  | 3 | 3 | 3 | 14 | 1 | 3,7 |
| C4 | 1 | 3 | 0 |  | 3 | 3 | 10 | 3 | 2,9 |
| C5 | 0 | 3 | 0 | 0 |  | 1 | 4 | 5 | 1,9 |
| C6 | 0 | 3 | 0 | 0 | 2 |  | 5 | 4 | 2,1 |

Table b3 The results of aggregation (detection)

|  | C1 | C2 | C3 | C4 | C5 | C6 | ai | rank | scale (1-4) |
| --- | --- | --- | --- | --- | --- | --- | --- | --- | --- |
| C1 |  | 0 | 2 | 0 | 2 | 0 | 4 | 4 | 2,3 |
| C2 | 2 |  | 1 | 2 | 2 | 0 | 7 | 2 | 3 |
| C3 | 0 | 1 |  | 0 | 1 | 0 | 2 | 5 | 1,8 |
| C4 | 2 | 0 | 2 |  | 2 | 0 | 6 | 3 | 2,7 |
| C5 | 0 | 0 | 1 | 0 |  | 0 | 1 | 6 | 1,4 |
| C6 | 2 | 2 | 2 | 2 | 2 |  | 10 | 1 | 4 |
